# Supplementary material for: Extensive HPLC-tandem mass spectrometry characterization of soluble degradation products of biodegradable nanoplastics under environmentally relevant temperature and irradiation conditions
Source: Royal Society of Chemistry journal article supplement (doi:10.1039/d3en00960b), 2024-01-01
Supplement: d3en00960b1.pdf [file d3en00960b1.pdf]

## Extensive HPLC-tandem mass spectrometry characterization of soluble degradation products of biodegradable nanoplastics under environmentally relevant temperature and irradiation conditions

By Thierry Douki, V erane Bard, Ma eva Boul ee and Marie Carri ere

### Electronic Supplementary Information

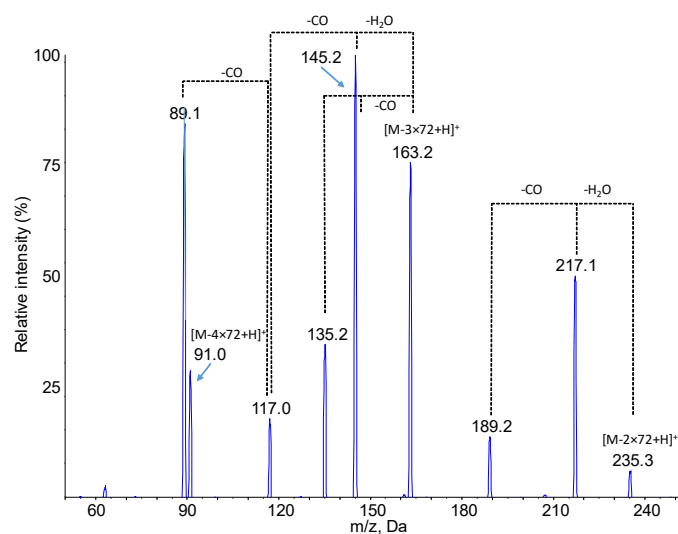

**Figure S1:** Positive electrospray ionization fragmentation mass spectra of the  $[M+NH_4]^+$  pseudo-pseudo molecular ion of compound PLA2, namely the PLA pentamer. The pseudo-molecular ion was at  $m/z=396$ . The first product ion was observed at  $m/z=235$ , which corresponds to loss of  $NH_3$ , and two lactic acid monomers. Subsequent fragmentations involve loss of water and CO. A fragment corresponding to the loss of 3 lactic acid units is also observed, which also undergoes loss of water and CO. A final product ion correspond to the loss of 4 lactic acid units.

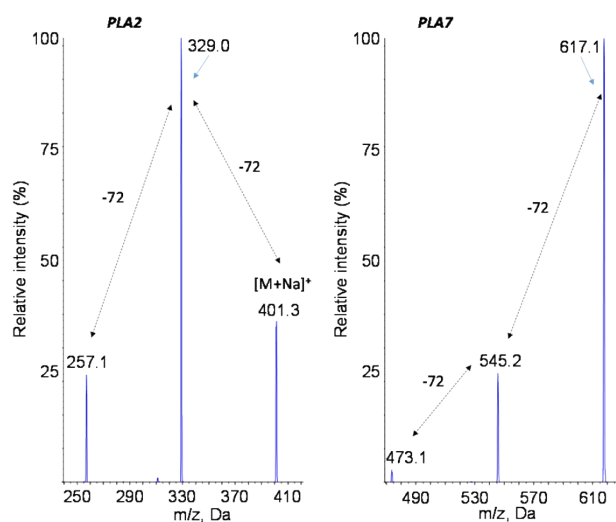

**Figure S2:** Positive electrospray ionization fragmentation mass spectra of the  $[M+Na]^+$  pseudo-pseudo molecular ion of compounds a) PLA2 and b) PLA7, namely the PLA pentamer and decamer.

**Table S1:** Summary of the precursor ions scan and neutral loss data obtained during analyses of aged PLA performed with positive and negative electrospray ionization.

| Compound #           | PLA1 | PLA2       | PLA3       | PLA4       | PLA5       | PLA6              | PLA7 |
|----------------------|------|------------|------------|------------|------------|-------------------|------|
| retention time (min) | 15.0 | 17.3       | 18.5       | 19.4       | 19.9       | 20.3              | 20.7 |
| m.w.                 | 306  | 378        | 450        | 522        | 594        | 666               | 738  |
| Number of PLA units  | 4    | 5          | 6          | 7          | 8          | 9                 | 10   |
| positive ionization  |      |            |            |            |            |                   |      |
| $[M+Na]^+$ MS1       | 329  | 401        | 473        | 545        | 617        | n.d.              | n.d. |
| precursor of ions    | 257  | 257<br>329 | 329<br>401 | 401<br>473 | 473<br>545 | n.d.              | n.d. |
| $[M+Na]^+$ with NL72 | n.d. | 401        | 473        | 545        | 617        | 689               | 761  |
| negative ionization  |      |            |            |            |            |                   |      |
| $[M-H]^-$ MS1        | n.d. | 377        | 449        | 521        | 593        | 665               | 737  |
| precursor of ions    | n.d. | n.d.       | n.d.       | 449        | 449<br>521 | 449<br>521<br>593 | 521  |
| $[M-H]^-$ with NL 72 | n.d. | 377        | 449        | 521        | 593        | 665               | n.d. |

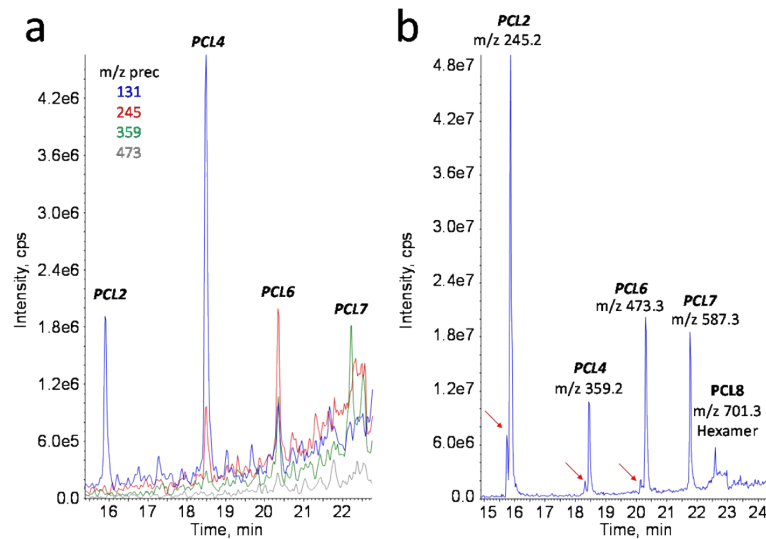

**Figure S3:** a) Precursor ion scan analysis of aged PCL with negative electrospray ionization. The targeted ions were those identified by MS2 analyses and are listed on the figure; b) Neutral loss analysis of aged PCL with negative electrospray ionization. The monitored loss was -72. The value of the determined pseudo-molecular ion is shown on top of each peak. The red arrows show the peaks corresponding to methylated PCL oligomers.

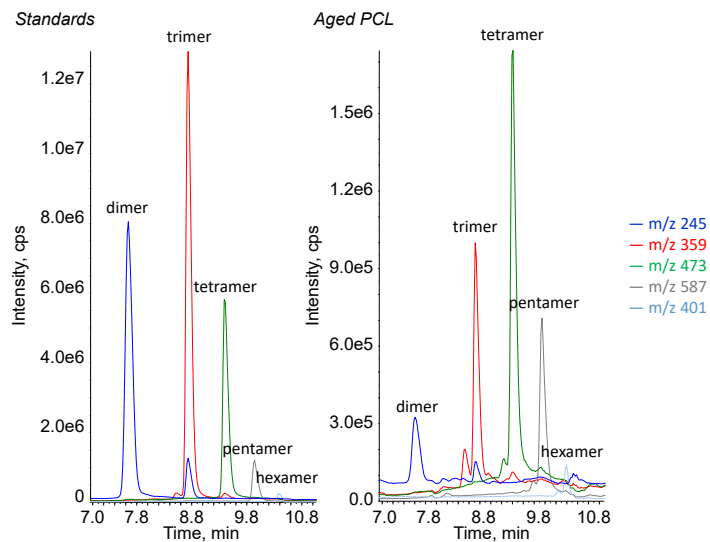

**Figure S4:** Comparison of the HPLC-MS detection of synthetic standards of PCL oligomers (100 ng total) and products detected after 60 h of aging of PCL particles in water. The reported chromatograms corresponded to the pseudo-molecular ions of the oligomers of PCL (m/z 245, 359, 473, 587 and 701 for the dimer, trimer, tetramer, pentamer and hexamer, respectively).

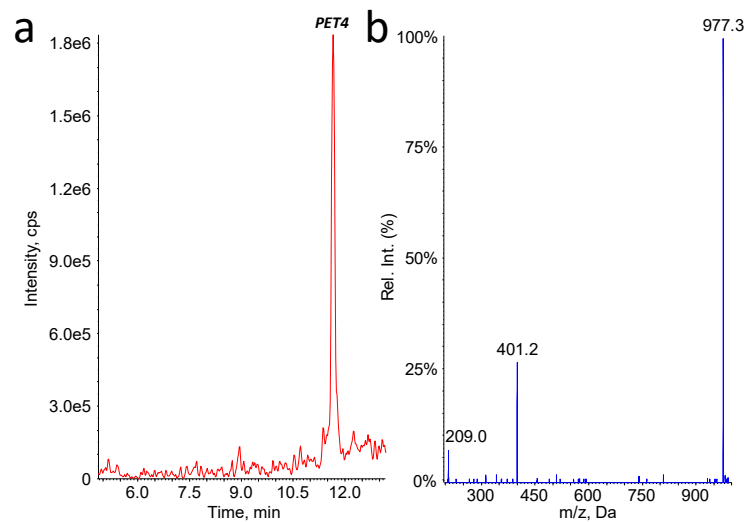

**Figure S5:** Product ion scan characterization of PET4, the PET pentamer. The pseudo-molecular ion was set at 977. a) Chromatogram representing the total ion current in the 200-1000 mass range; b) fragmentation mass spectra of the product eluting at 11.6 min, the PET pentamer.
